# Supplementary material
Source: publisher figshare collection journal article supplement (https://sage.figshare.com/ndownloader/files/17771339)

## **APPENDIX 1**

Figure i: Bland-Altman plot for the agreement of the ABC in a sample of adults with a) unilateral transtibial amputation of vascular etiology, b) unilateral transtibial amputation of non-vascular etiology, and c) unilateral transfemoral amputation or bilateral amputation of any etiology (n= 20).

**a)**

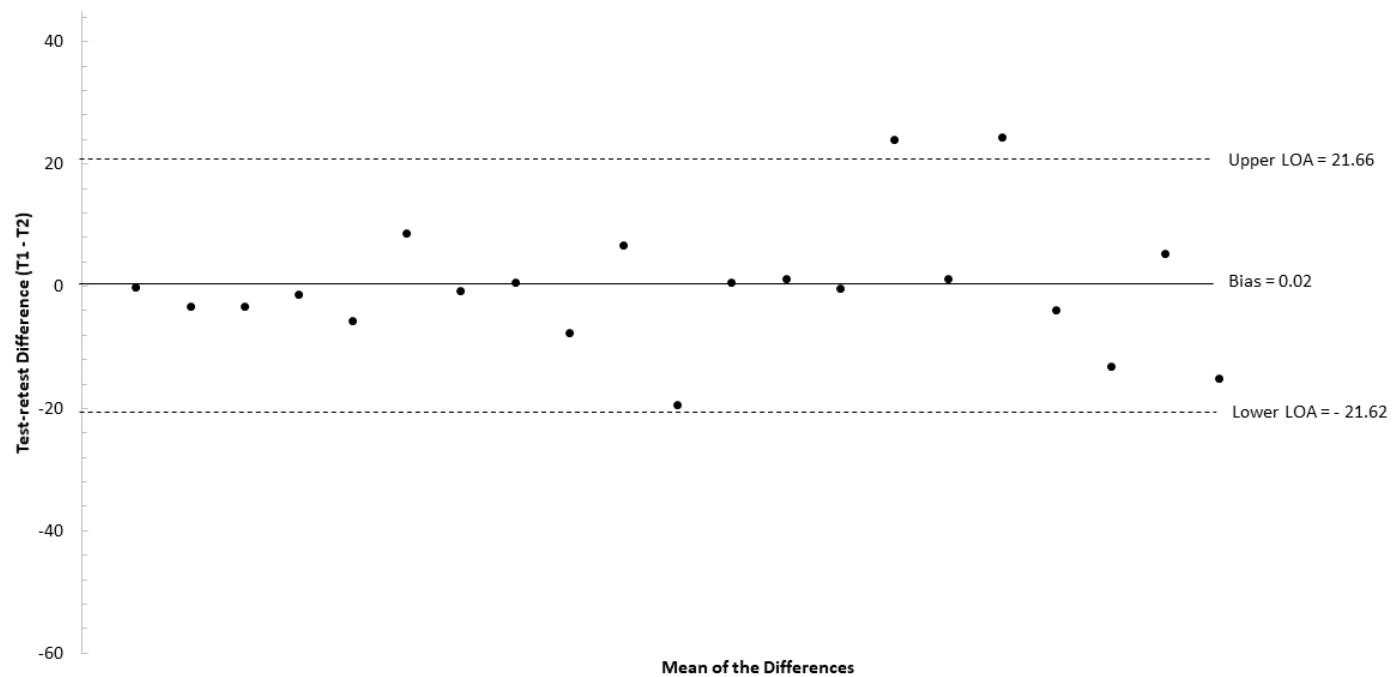

b)

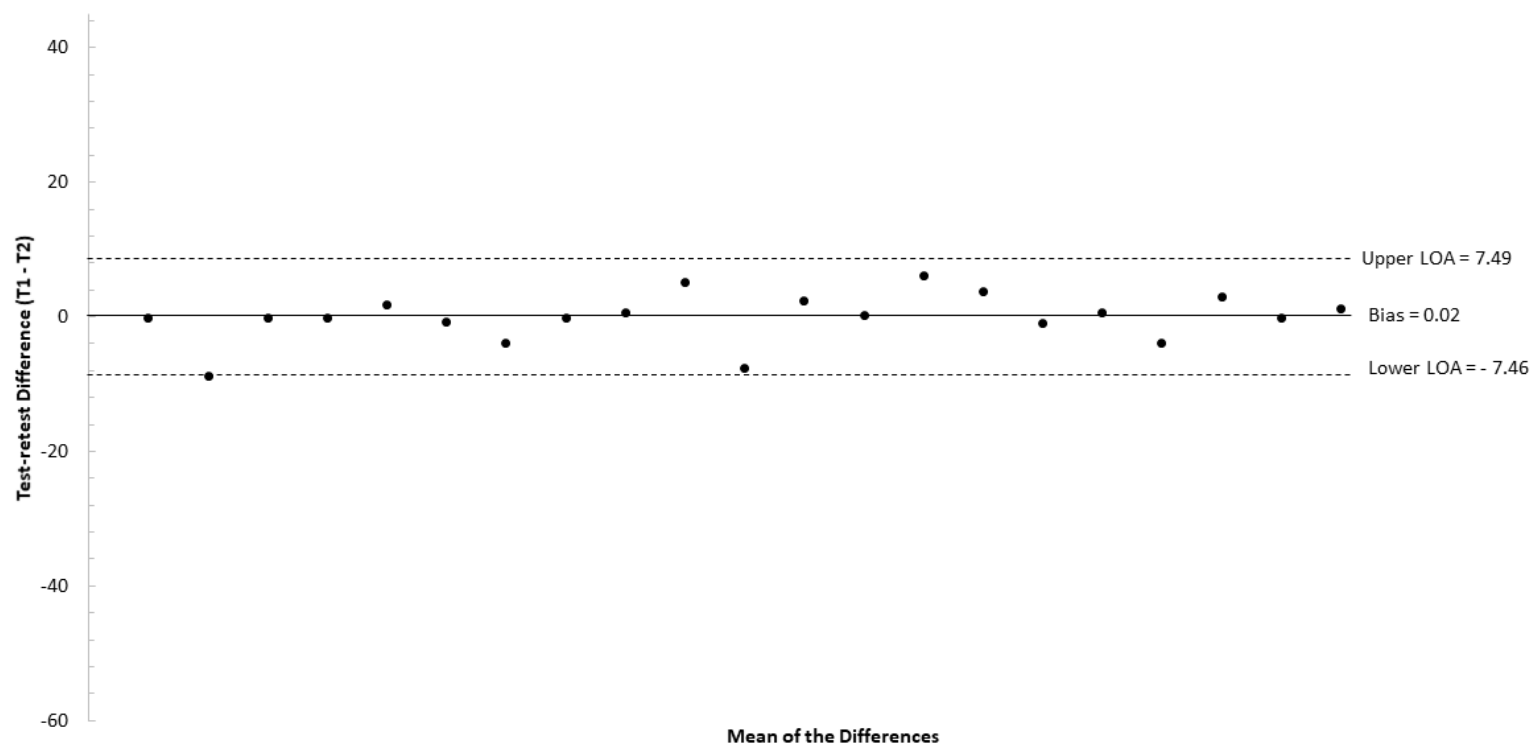

c)

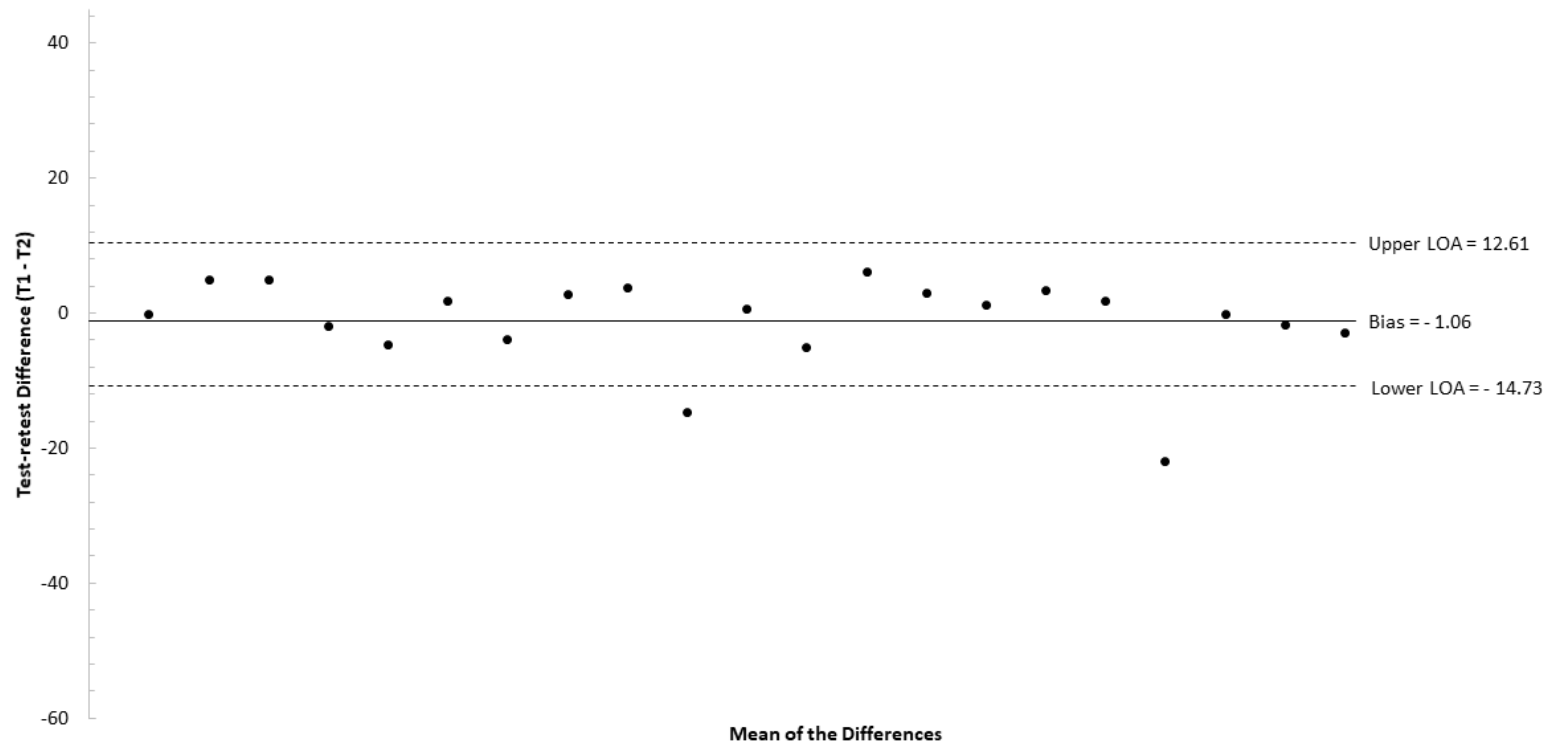

Figure ii: Bland-Altman plot for the agreement of the ABC-6 in a sample of adults with a) unilateral transtibial amputation of vascular etiology, b) unilateral transtibial amputation of non-vascular etiology, and c) unilateral transfemoral amputation or bilateral amputation of any etiology (n= 20).

**a)**

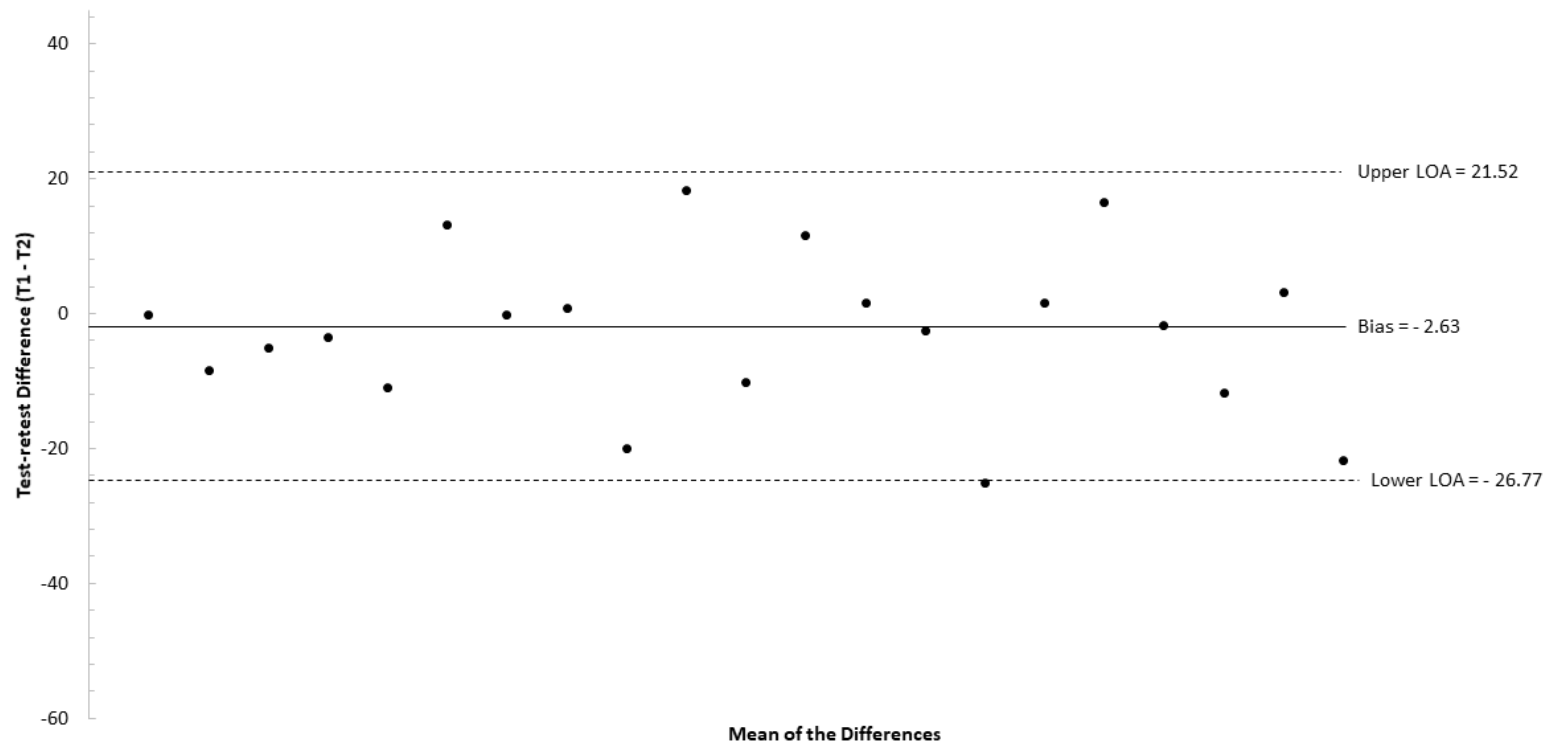

b)

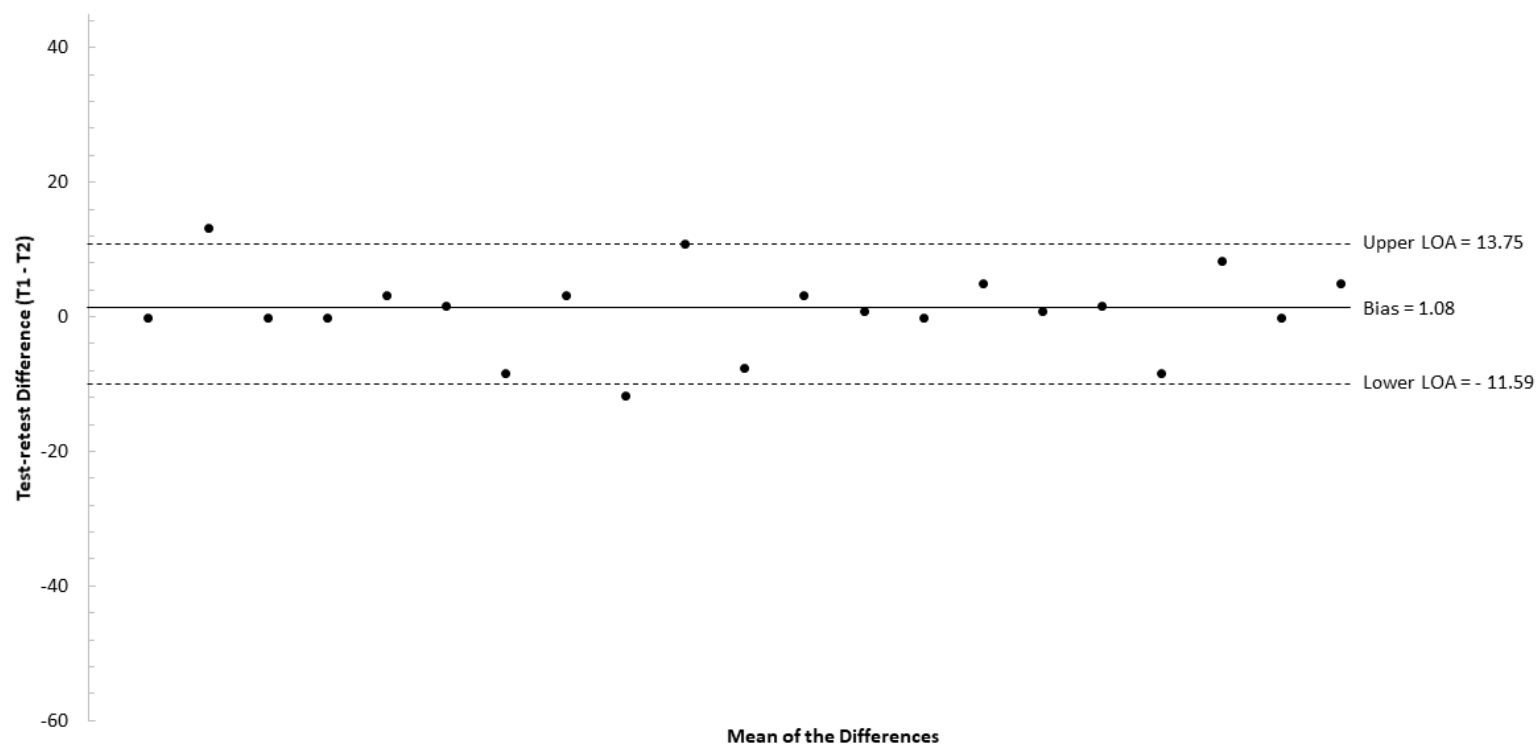

c)

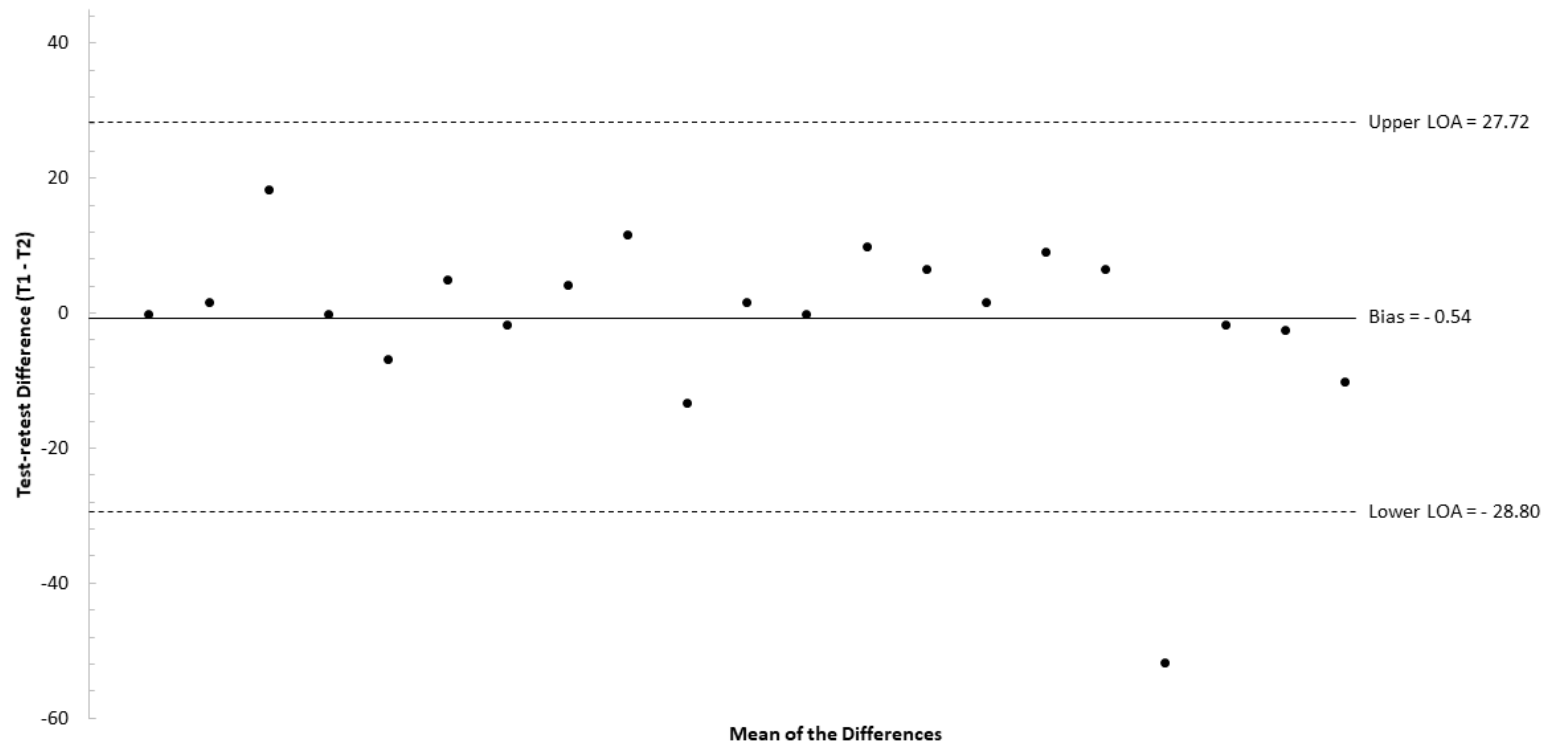

Figure iii: Bland-Altman plot for the agreement between the ABC-6 and the ABC in a sample of adults with a) unilateral transtibial amputation of vascular etiology, b) unilateral transtibial amputation of non-vascular etiology, and c) unilateral transfemoral amputation or bilateral amputation of any etiology (n= 20).

a)

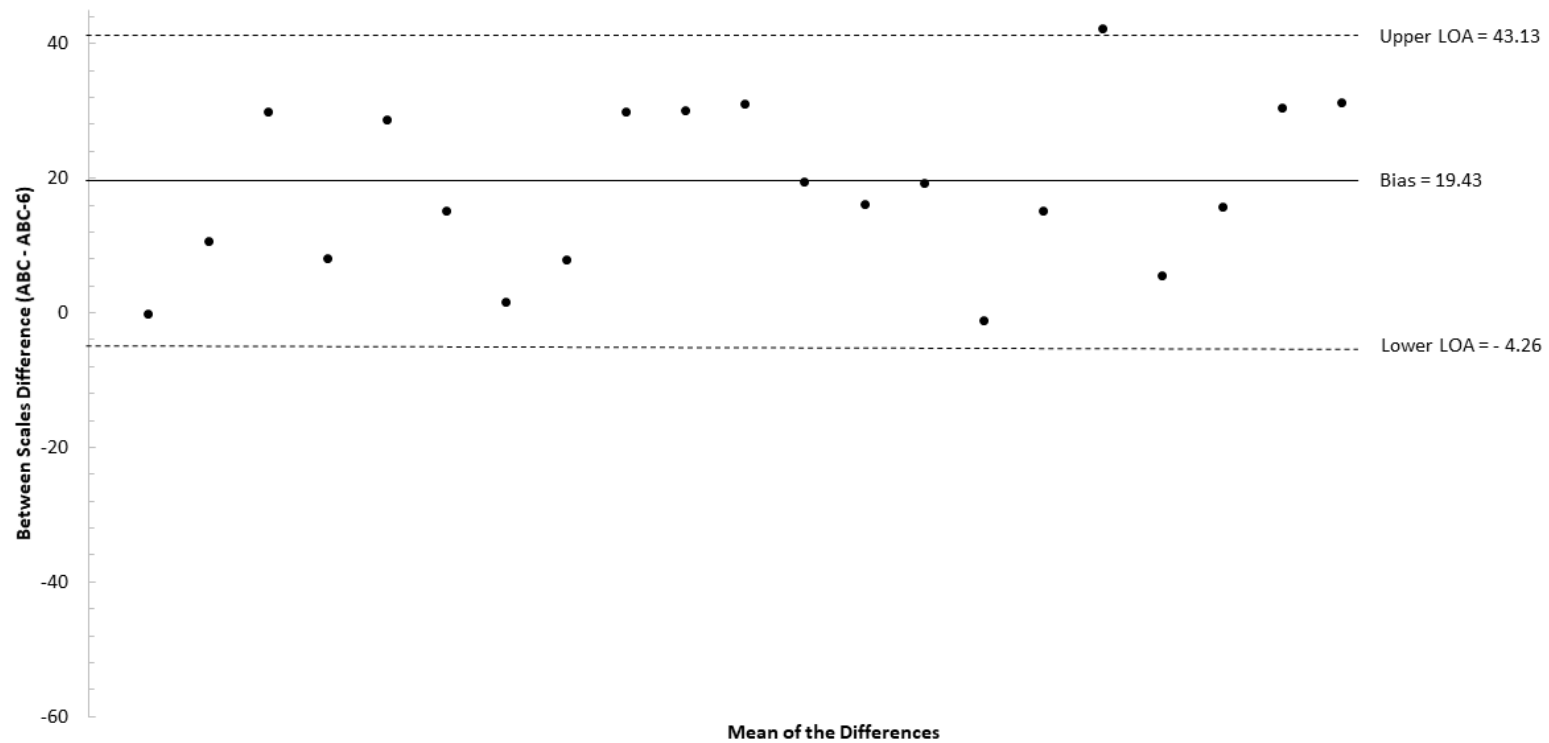

b)

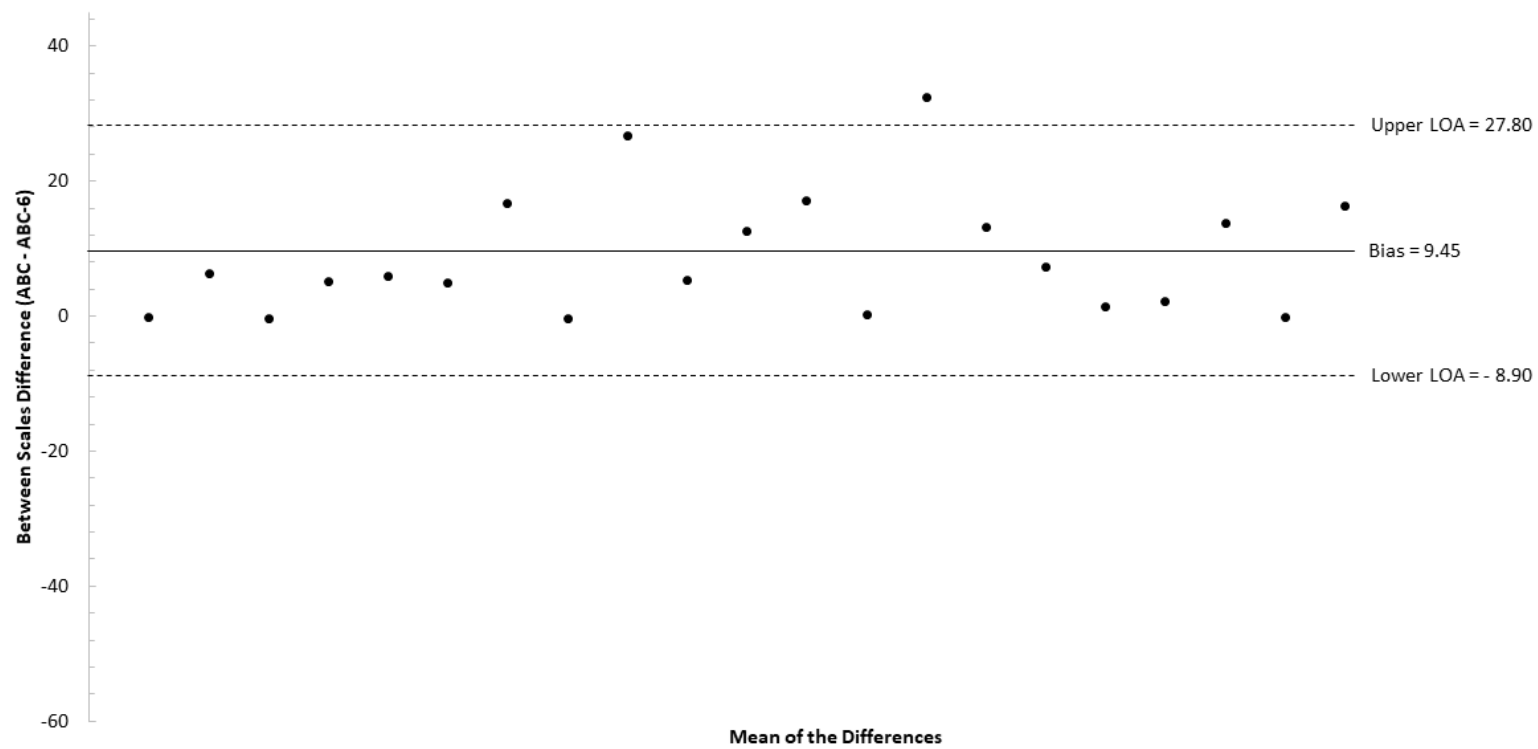



c)

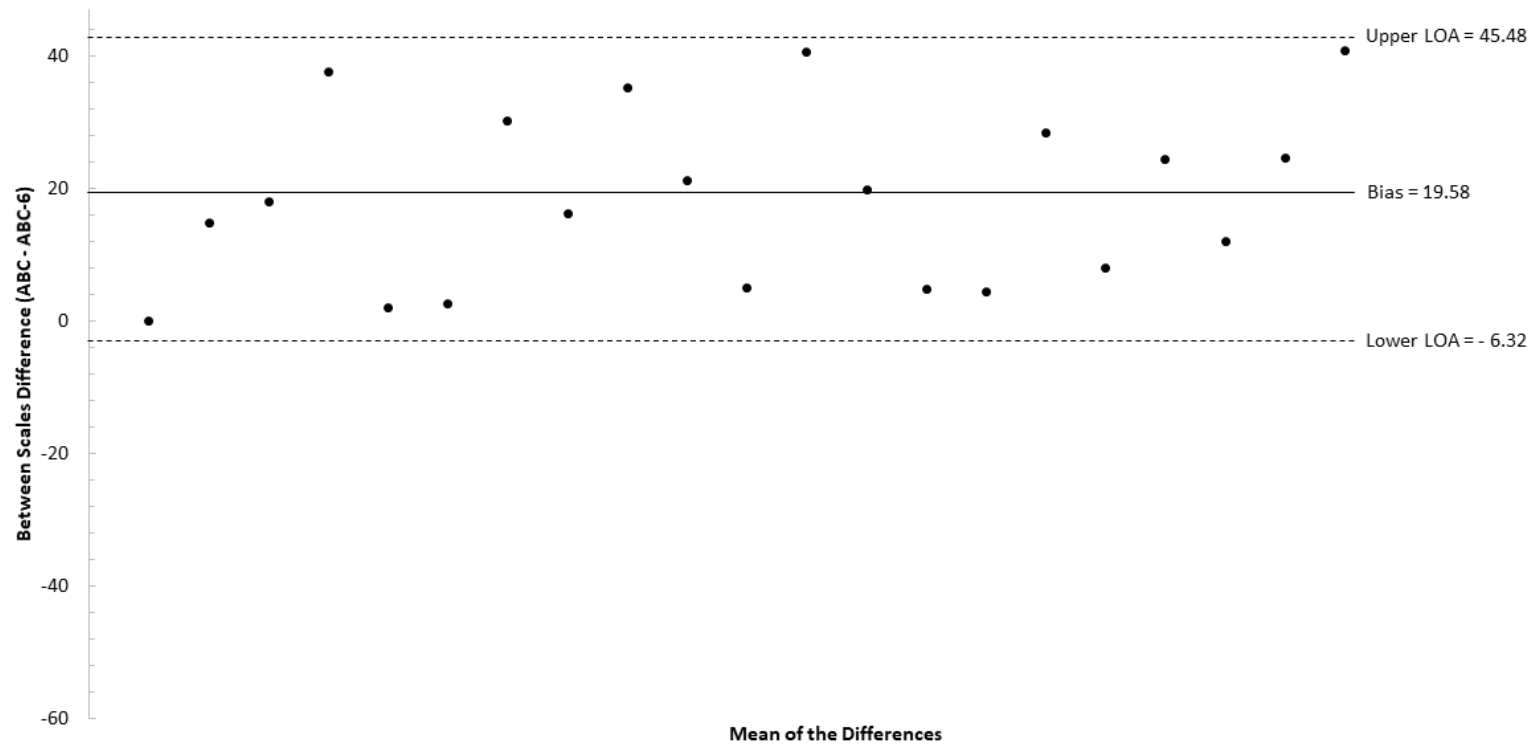

Supplement: Supplementary file 1 [file 17771339]
